# Supplementary material
Source: PubMed Central journal article supplement (PMC7097846)

## Supplementary Online Content

Kuo AC, Giori NJ, Bowe TR, et al. Comparing methods to determine the minimal clinically important differences in patient-reported outcome measures for veterans undergoing elective total hip or knee arthroplasty in Veterans Health Administration hospitals. *JAMA Surg*. Published online March 25, 2020.

doi:10.1001/jamasurg.2020.0024

### **eFigure.** Receiver Operating Characteristic Curves

This supplementary material has been provided by the authors to give readers additional information about their work.

**eFigure.** Receiver Operating Characteristic Curves

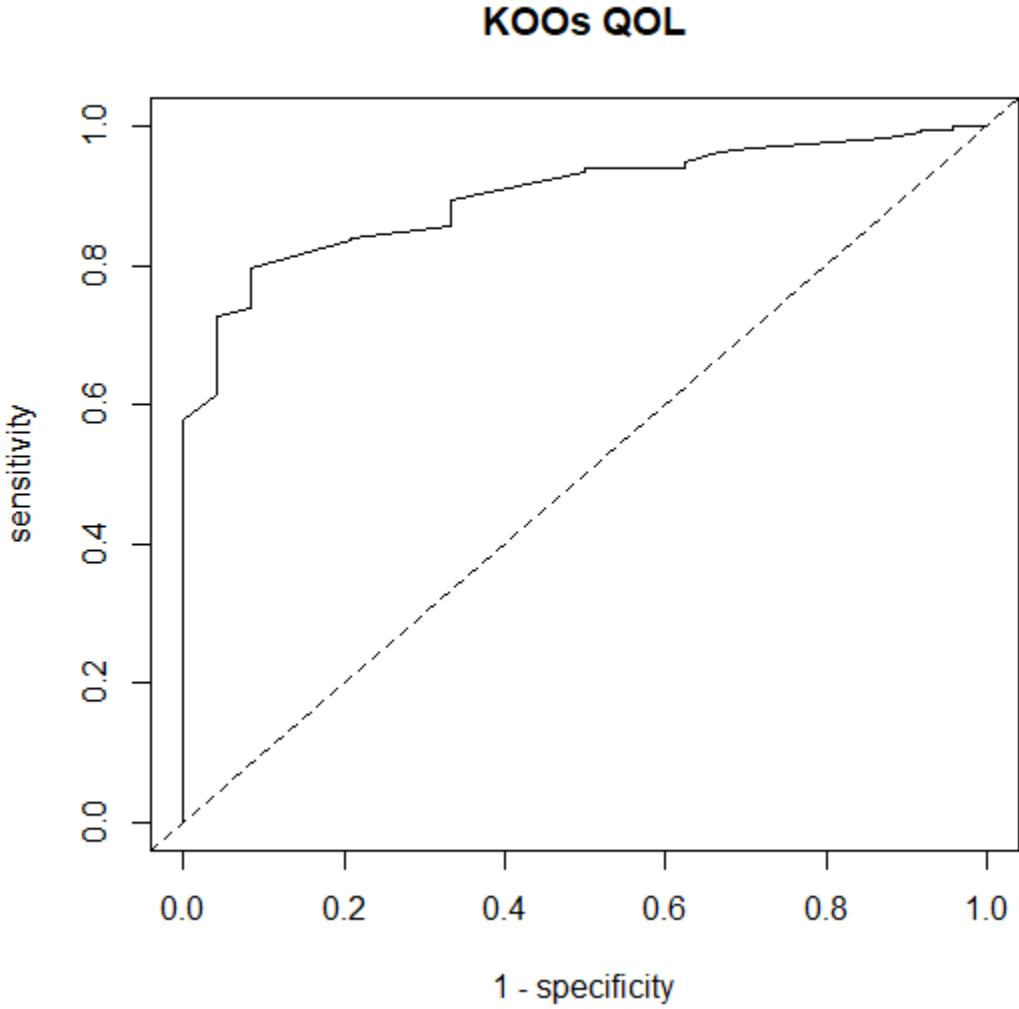

### KOOs Jrsum

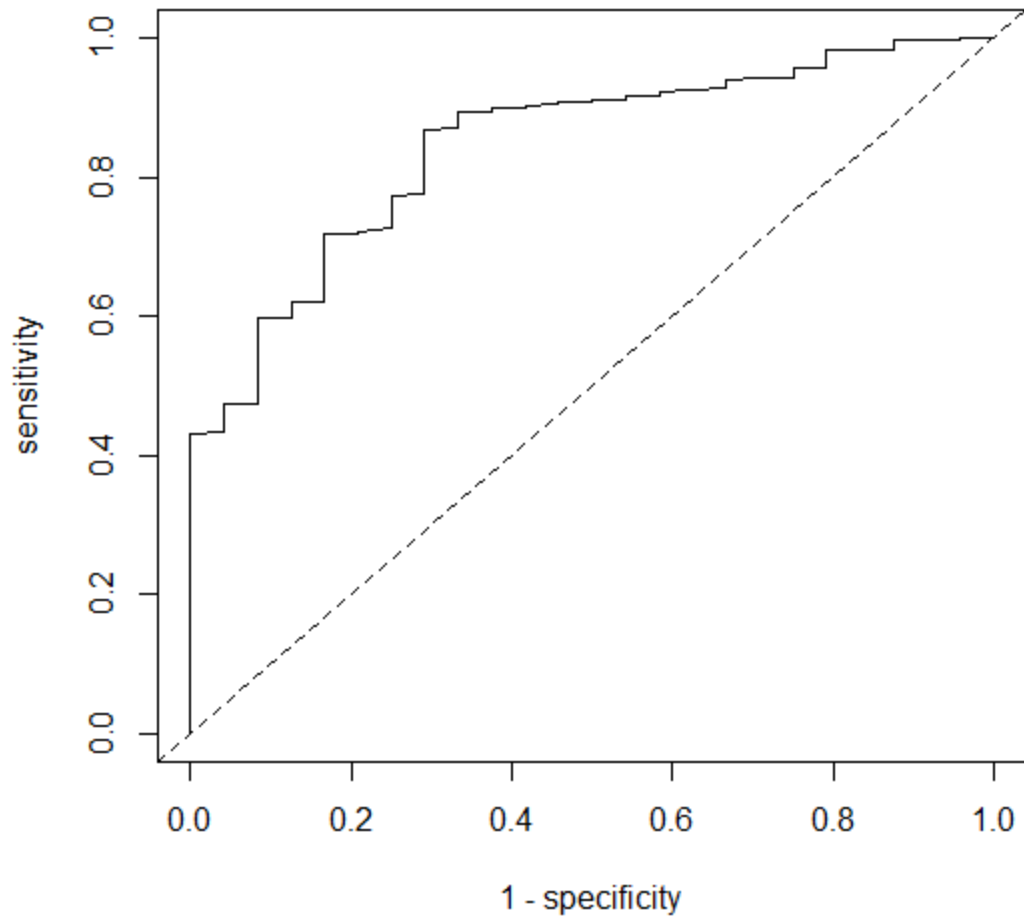

### KOOs pain

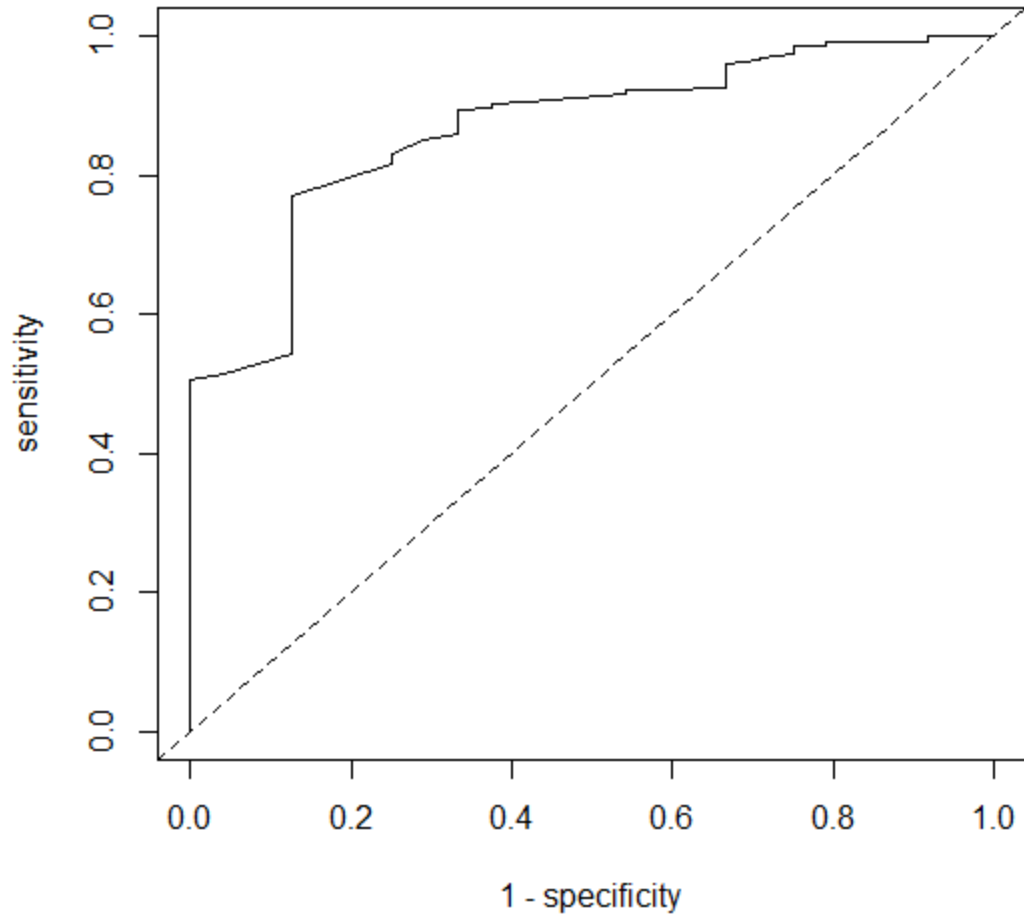

### KOOs symp

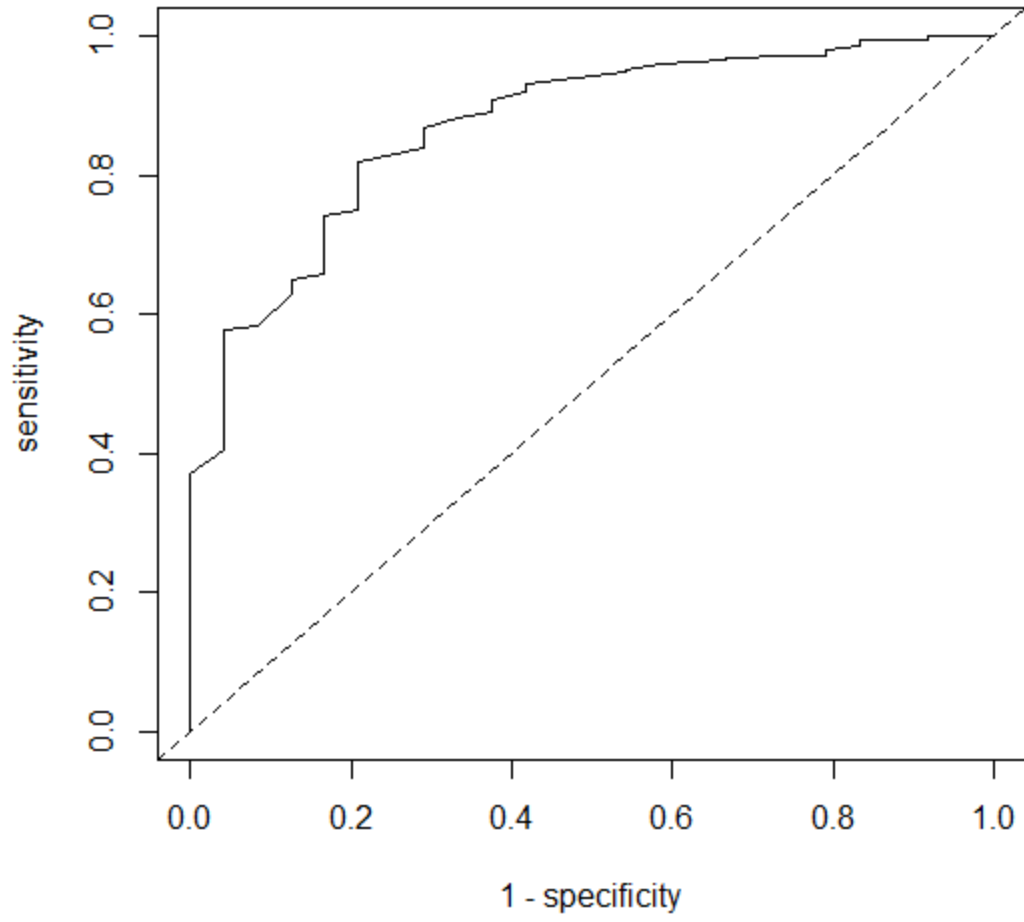

### KOOs sum

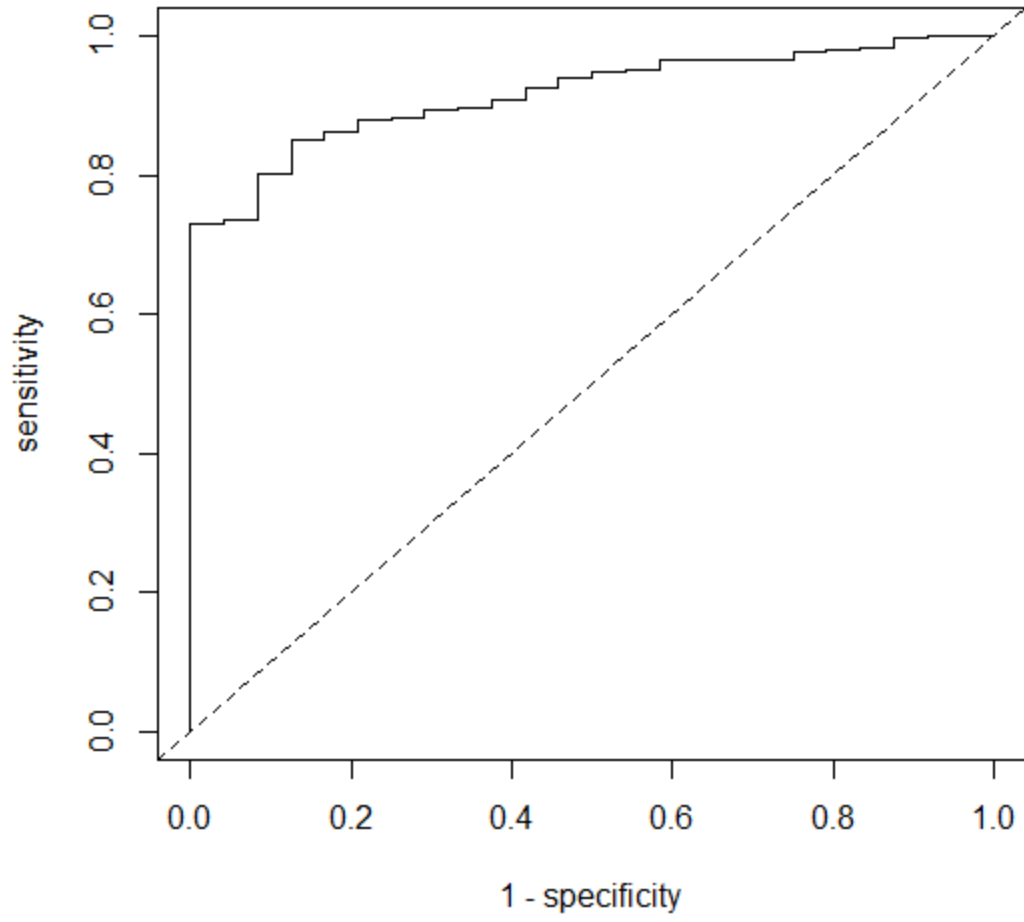

### KOOs ADL

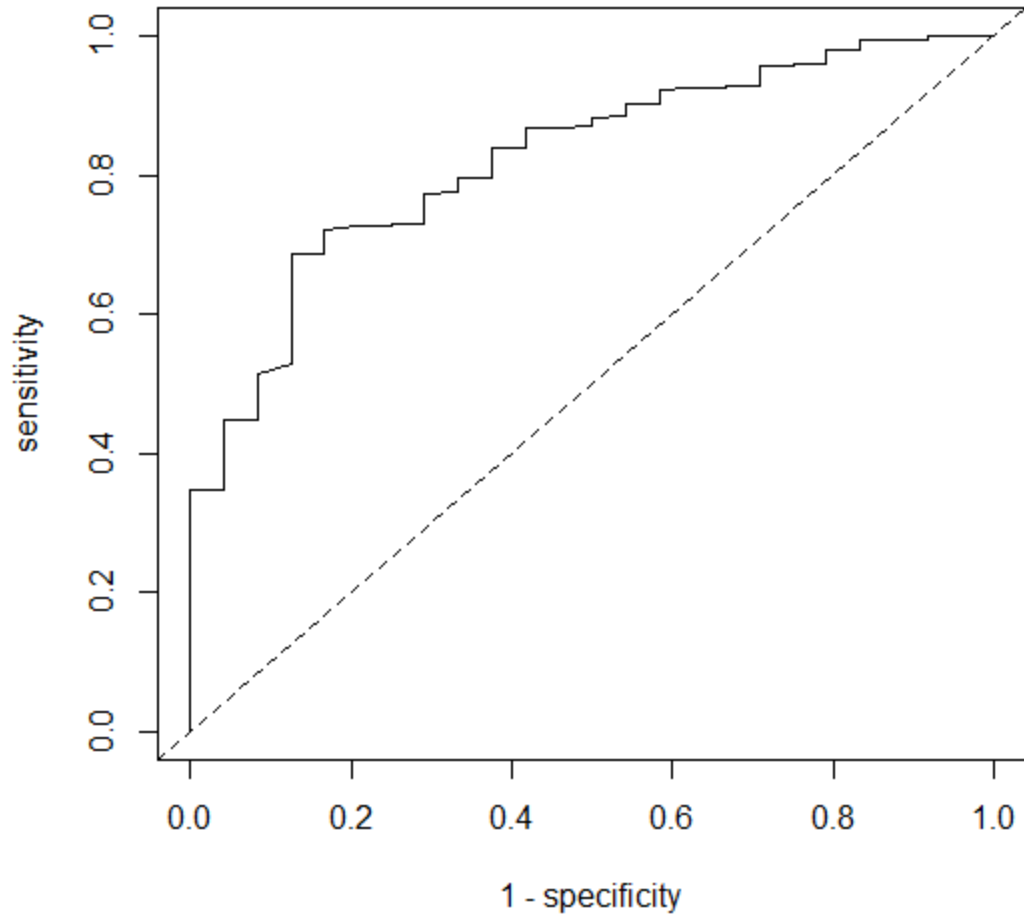

### KOOs rec

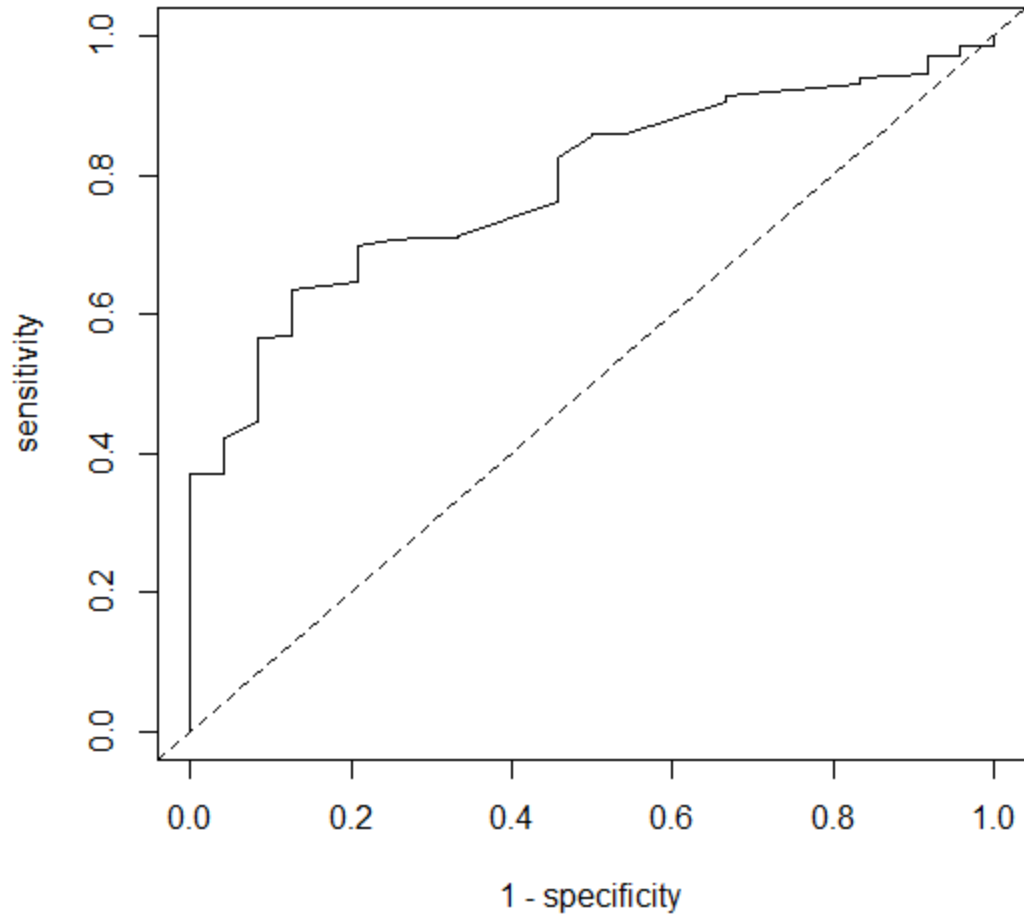



### HOOs pain

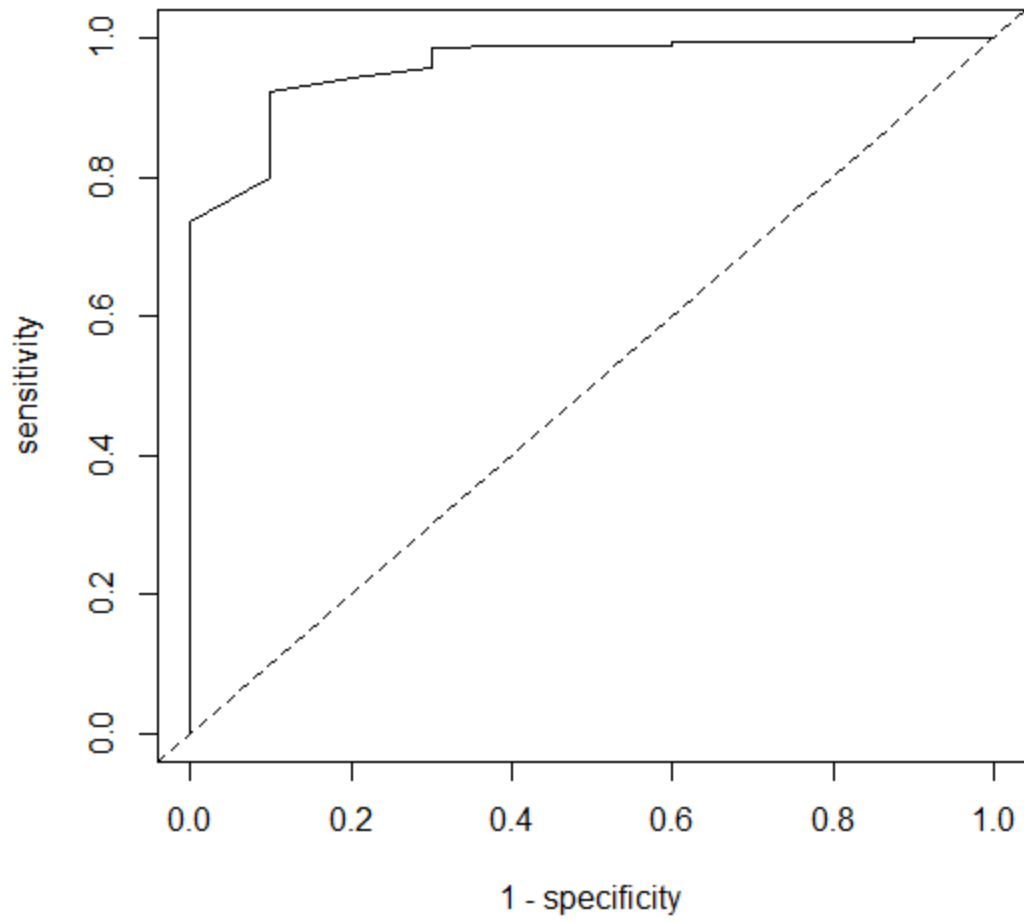

### HOOs rec

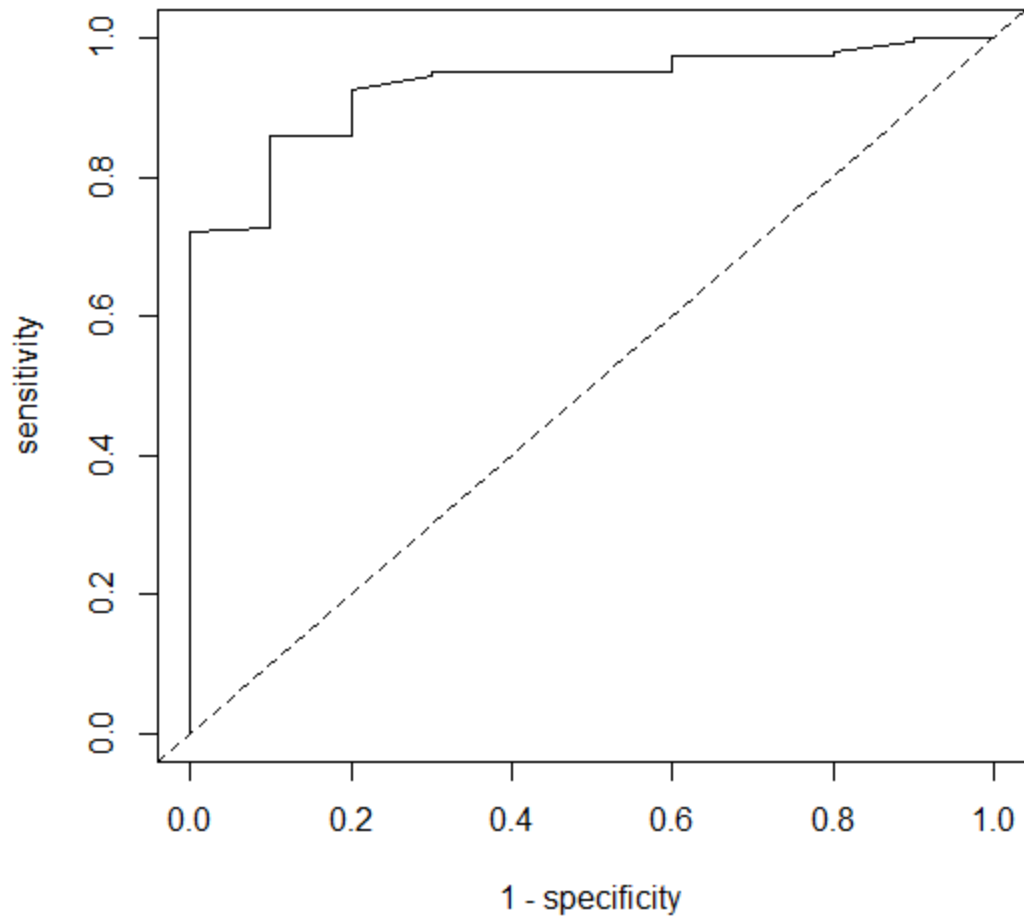

### HOOs ADL

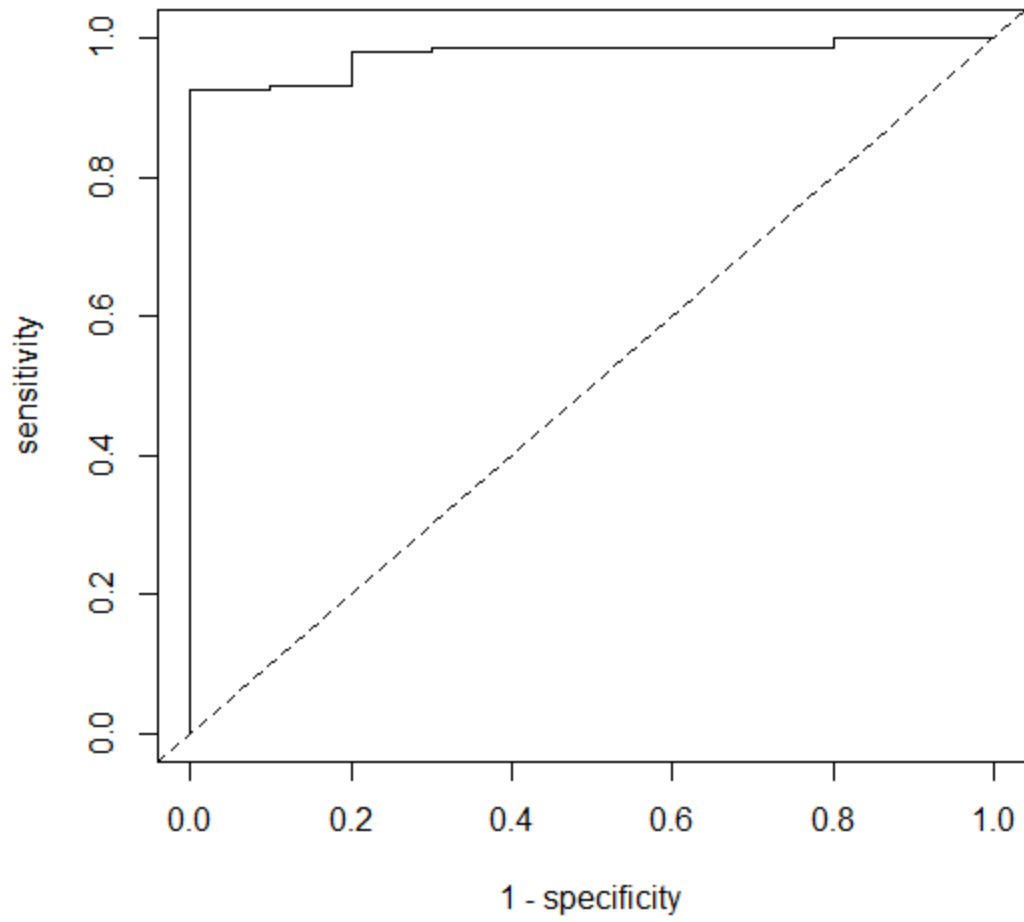

### HOOs QOL

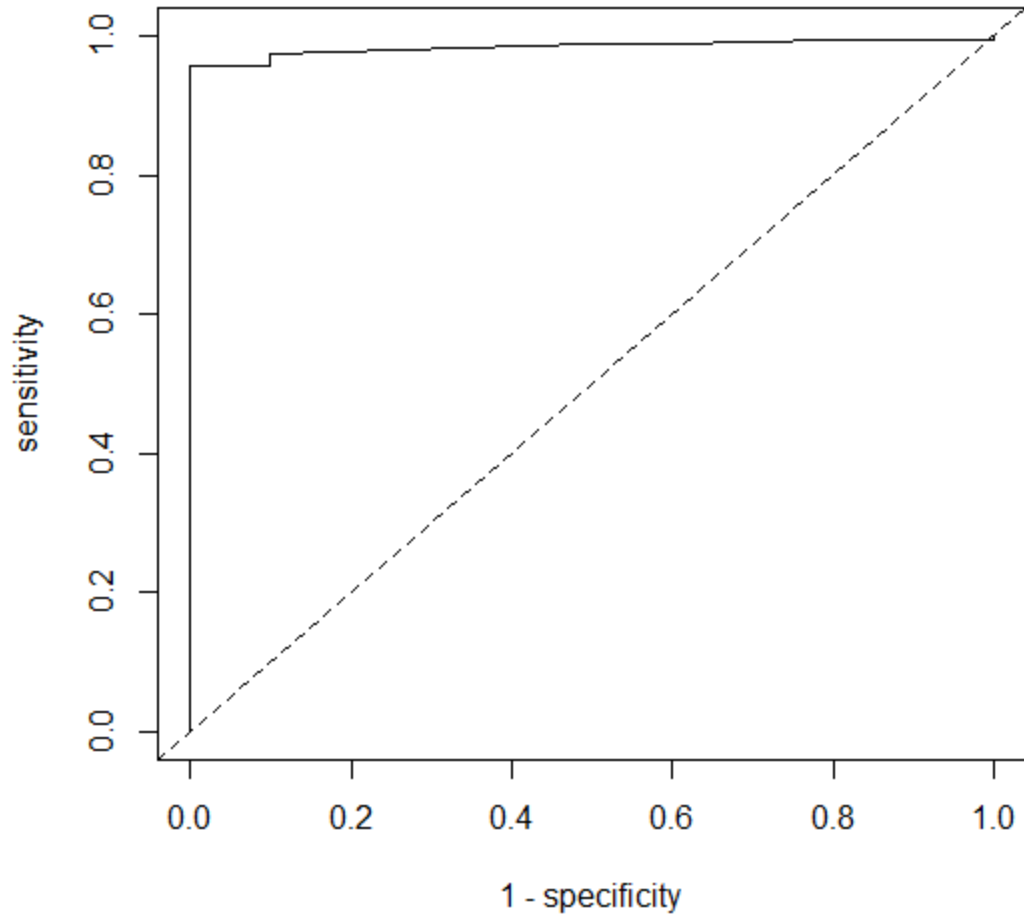

### HOOs symp

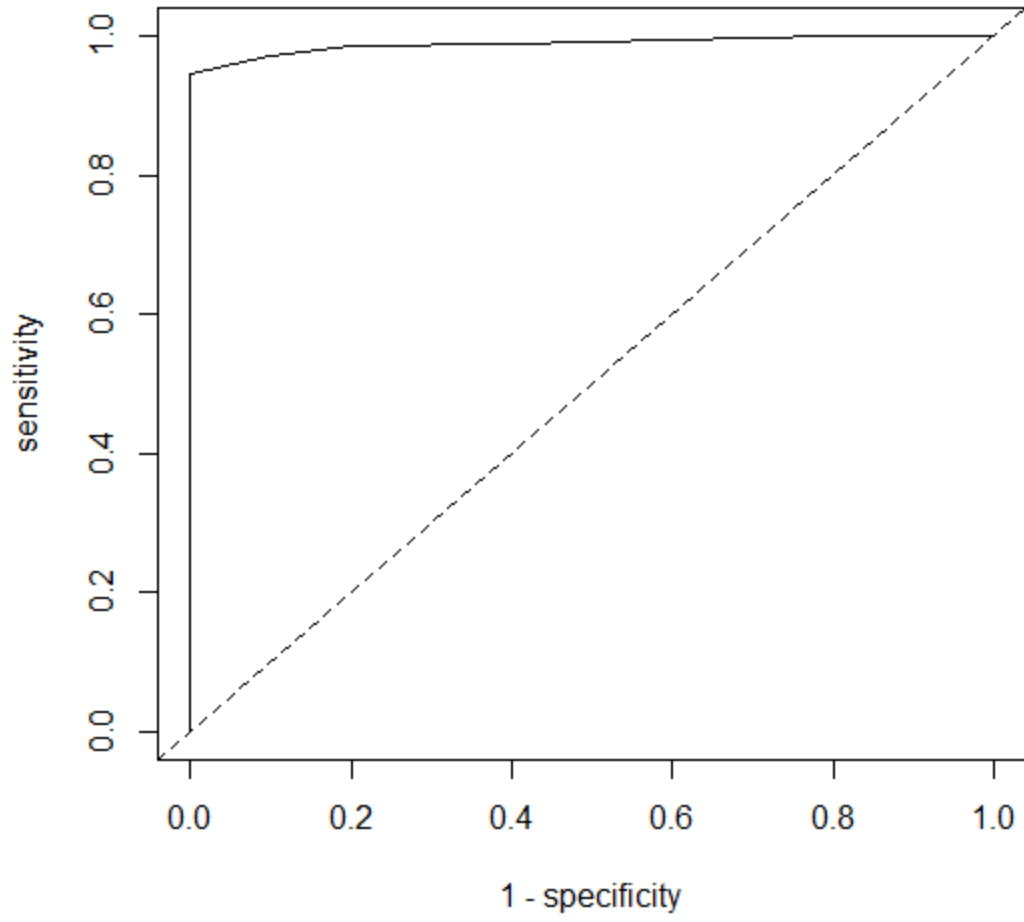

### HOOs sum

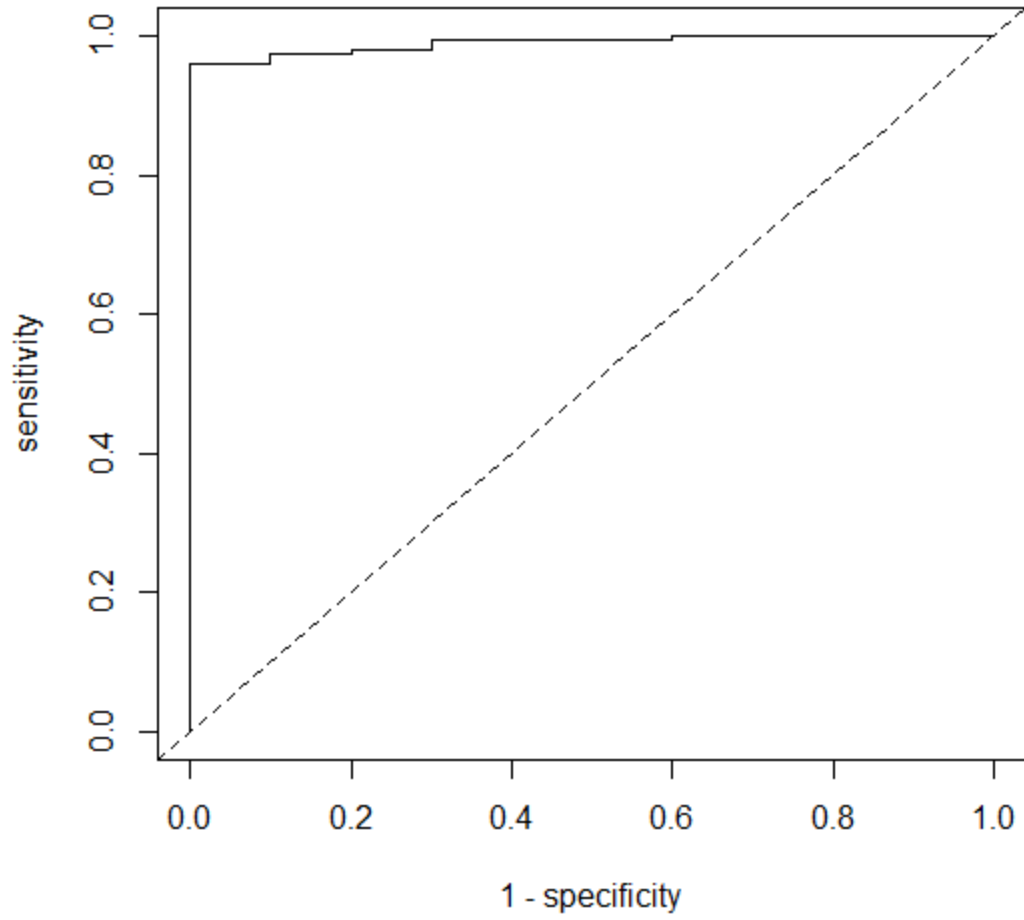

### HOOs Jrsum

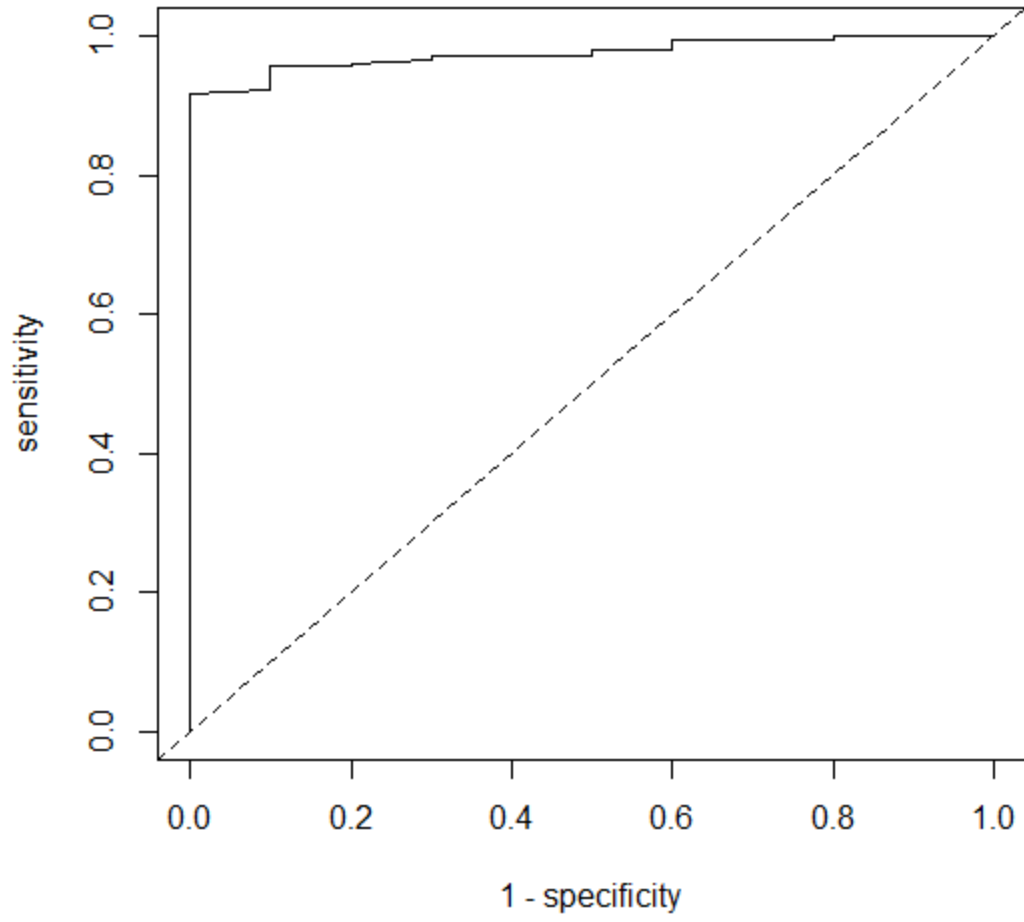

Supplement: jamasurg-e200024-s001.pdf [file jamasurg-e200024-s001.pdf]
